# Supplementary material for: A resonant sextuplet of sub-Neptunes transiting the bright star HD 110067
Source: Springer Nature journal article supplement (doi:10.1038/s41586-023-06692-3), 2023-11-29
Supplement: 41586_2023_6692_MOESM1_ESM.pdf [file 41586_2023_6692_MOESM1_ESM.pdf]

---

**Supplementary information**

---

**A resonant sextuplet of sub-Neptunes  
transiting the bright star HD 110067**

---

In the format provided by the  
authors and unedited

# Supplementary Information

## **Figures and Tables**

2 *Supplementary Information*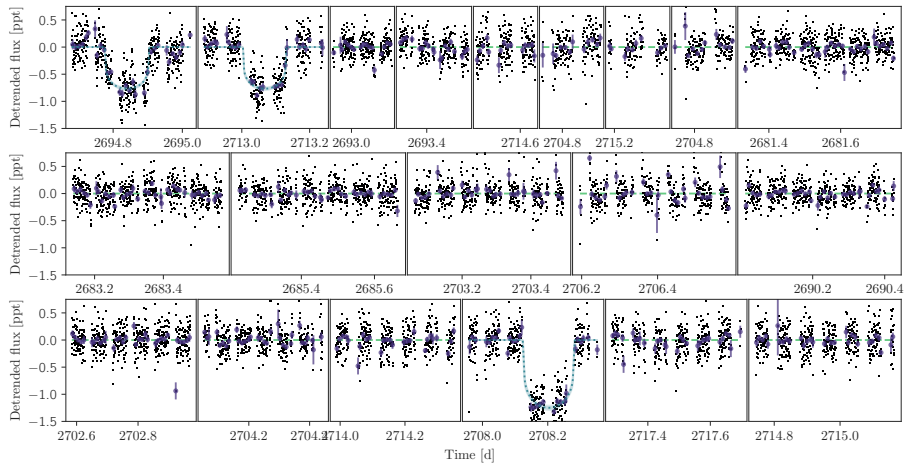

**Fig. S1 Detrended CHEOPS photometry for all 19 visits.** Time units are in TESS Julian Date ( $TJD \equiv BJD - 2457000$ ), where BJD is the Barycentric Julian Date in units of days. Purple points show 15-minute bins. Dashed green lines show the best-fit planet models.

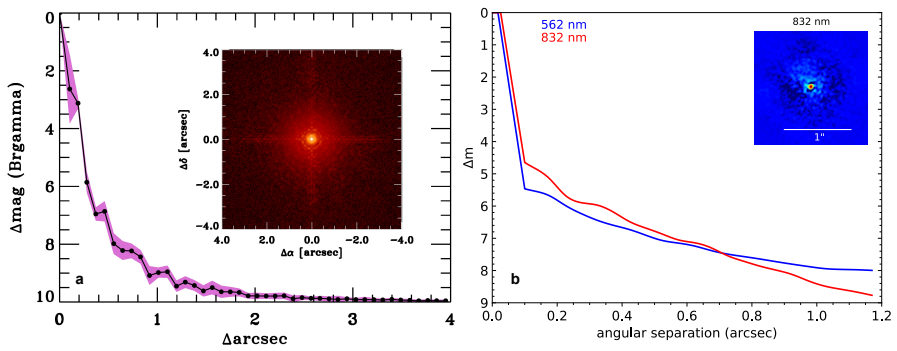

**Fig. S2 High-resolution imaging data of HD 110067. a,** Palomar NIR AO imaging and sensitivity curve for HD 110067 taken in the Br- $\gamma$  filter. The image reaches a contrast of  $\sim 8$  mag fainter than the host star within  $0.''5$ . The inset shows the image of the central portion of the data. **b,** Gemini optical speckle 5-sigma contrast curves for HD 110067 taken in the 562 nm and 832 nm bands. The images reach a contrast of  $\sim 7$  mag fainter than the host star within  $0.''5$ . The inset shows the 832 nm reconstructed speckle image.

4 *Supplementary Information*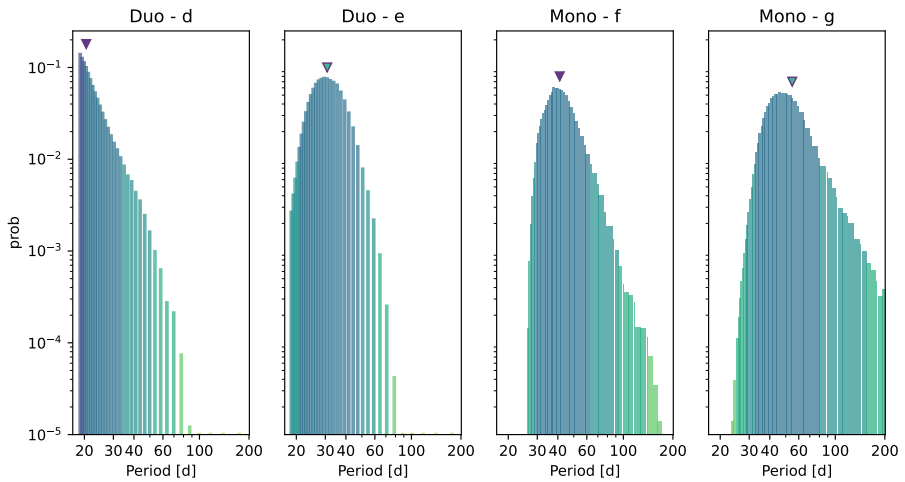

**Fig. S3** Probability of each plausible orbital period for the two duo-transit and the two mono-transit events as fitted using **MonoTools**. The triangles mark the final planet periods; confirmed in the case of planets d and f, and predicted in the case of e and g.

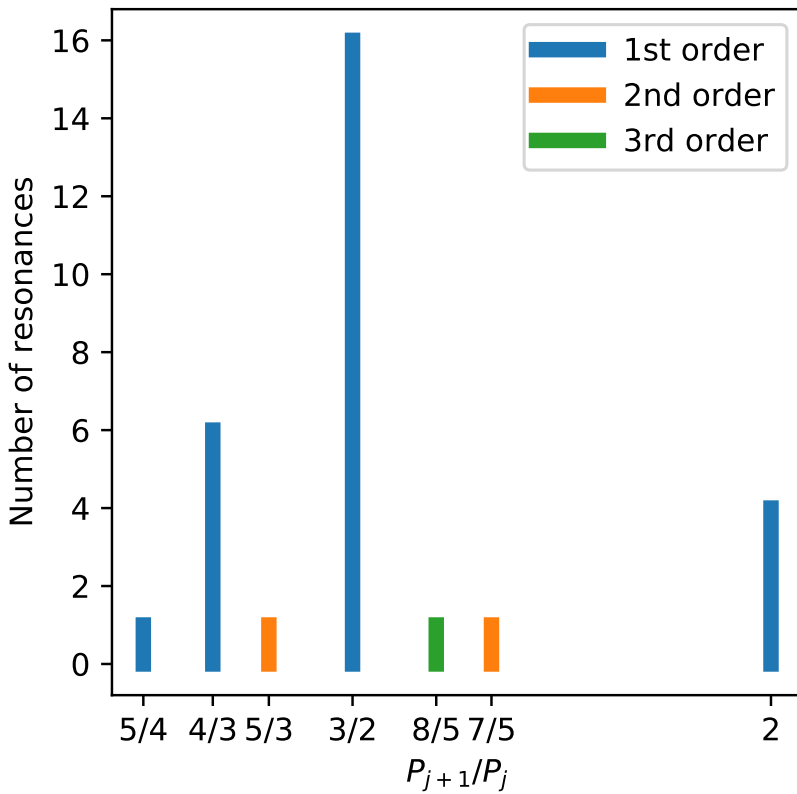

**Fig. S4** Nearest MMRs of neighboring pairs of known chains of 3-body MMRs. The near-3:1 MMR of Kepler-221 is not shown here. The histogram shows an overabundance of first-order MMRs, especially with a period ratio of 3/2.

6 *Supplementary Information*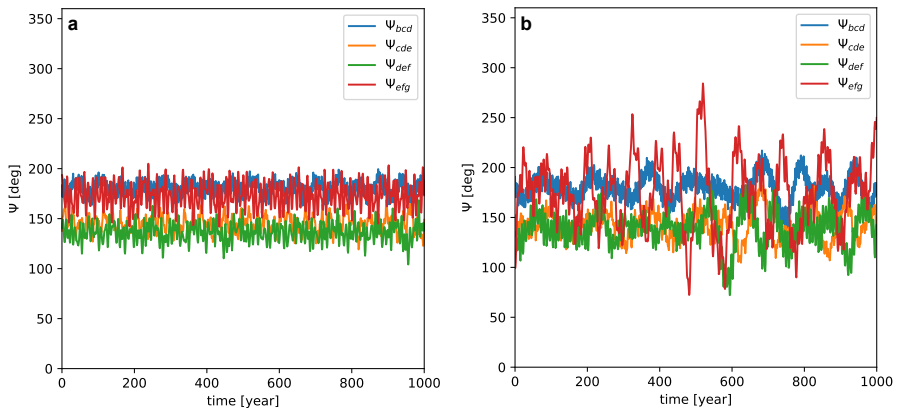

**Fig. S5** N-body integration of 1000 years of evolution for the best initial conditions. **a**, case A2. **b**, case A0. The minimization of the function  $C$  was performed over the first 200 years only.

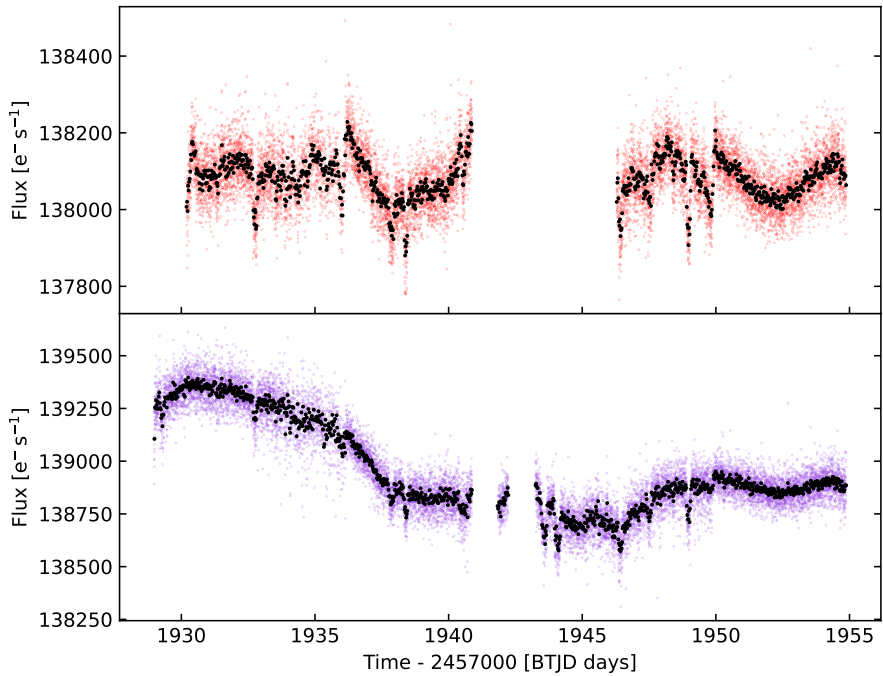

**Fig. S6** TESS S23 light curves from different data reduction pipelines. The upper panel shows the PDCSAP light curve provided by SPOC in the MAST archive. The lower panel shows our custom extraction using pixel level decorrelation techniques. We are able to recover most of the data affected by scattered light and high background contamination from the Earth and the Moon discarded in the PDCSAP. The PLD-corrected data shows an additional transit of planet b and two single-transit events corresponding to planets f and g based on our dynamical analysis.



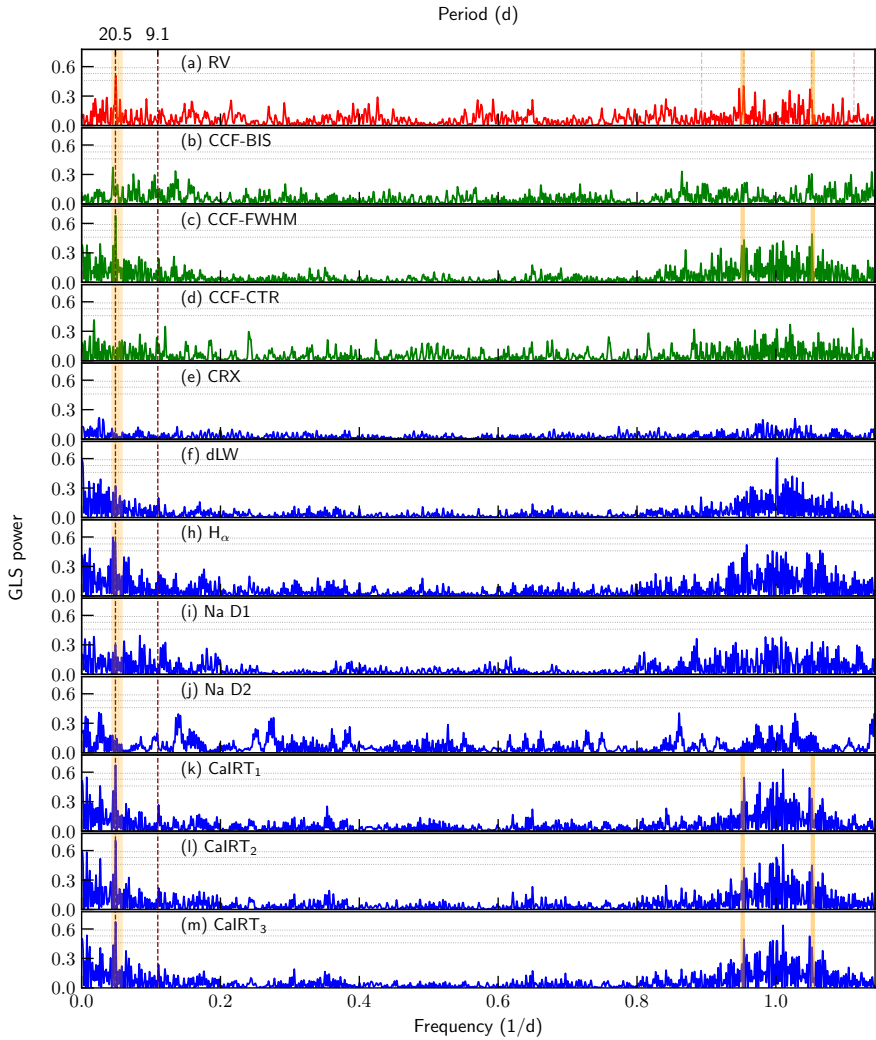

**Fig. S7** GLS periodograms of CARMENES data. Signals from transiting planets HD 110067 b ( $f_b = 0.1097 \text{ d}^{-1}$ ,  $P_b \sim 9.11 \text{ d}$ ) and HD 110067 d ( $f_d = 0.0487 \text{ d}^{-1}$ ,  $P_c \sim 20.52 \text{ d}$ ) are marked as vertical dark-red dashed lines. Vertical, light-red dashed lines on panel (a) indicate 1-day aliases of planets b and d. The vertical orange solid lines mark the frequency of the stellar rotation period ( $f_{\text{rot}} = 0.0505 \text{ d}^{-1}$ ,  $P_{\text{rot}} = 19.8 \pm 1 \text{ d}$ ) and its 1-day aliases. Panels plotted in green and blue show periodograms of spectral activity indicators measured with the CCF and template matching codes, respectively. Horizontal gray lines show the theoretical false alarm probability levels of 10% (dotted line), 1% (dashed line), and 0.1% (dash-dotted line).

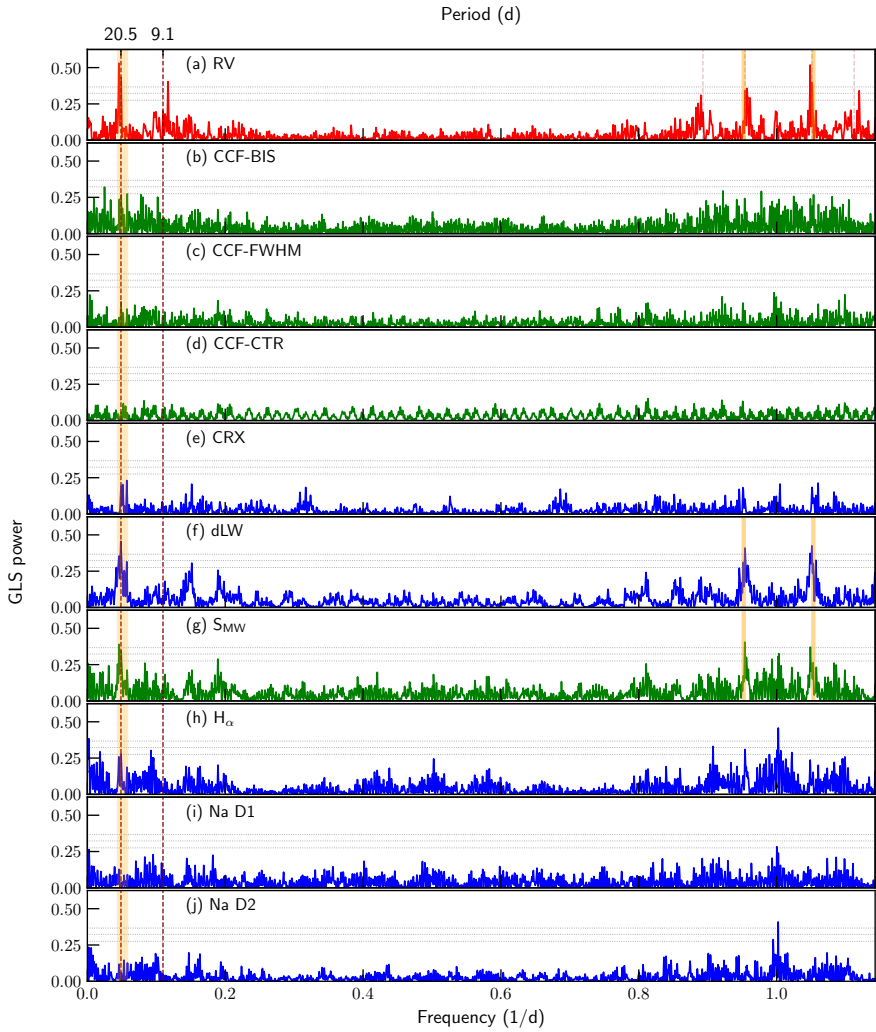

**Fig. S8** GLS periodograms of HARPS-N data. Panels, lines, and colors as in Fig. S7.

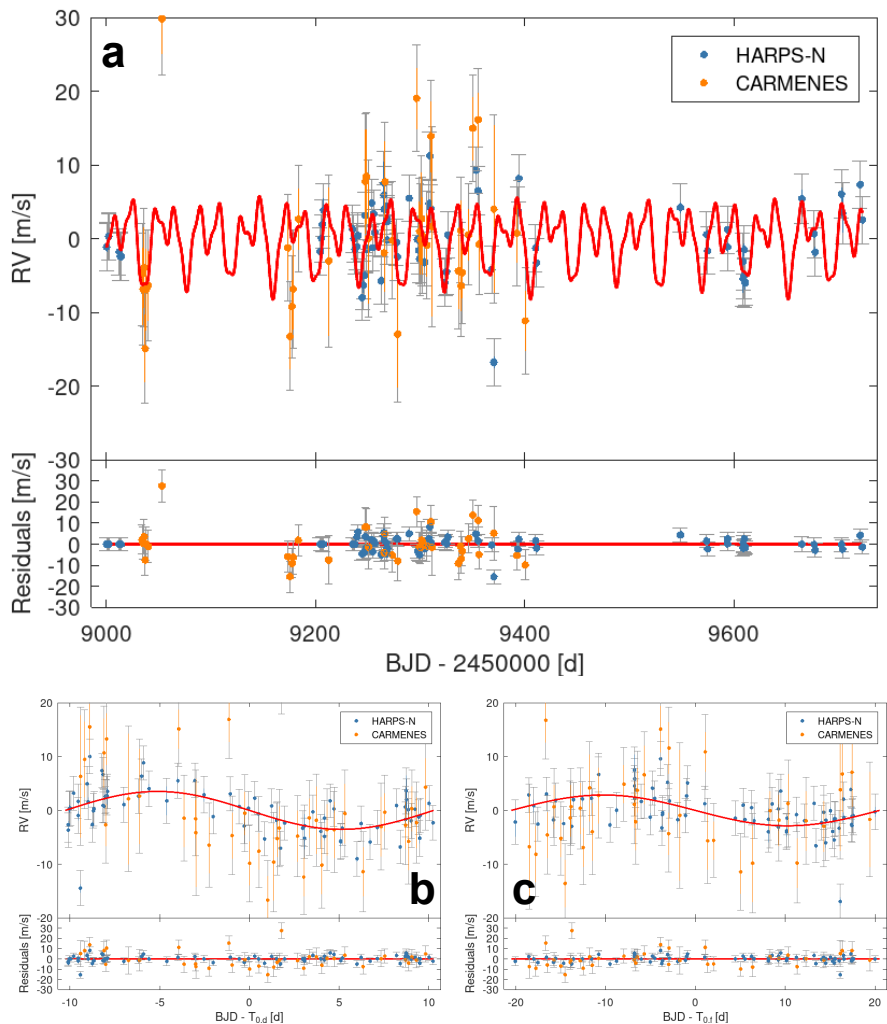

**Fig. S9** RV time series with the corresponding best-fit model from **Method I**. **a**, full RV time series comprising the data points from both HARPS-N (blue) and CARMENES (orange). **b,c**, phase-folded time series showing the Keplerian signals of the two planets detected with high statistical confidence ( $> 3\sigma$ ), HD 110067 d (**b**) and f (**c**). Radial velocity measurements are shown with solid circles with  $1\sigma$  error bars with a gray error bar extension accounting for the inferred jitter.

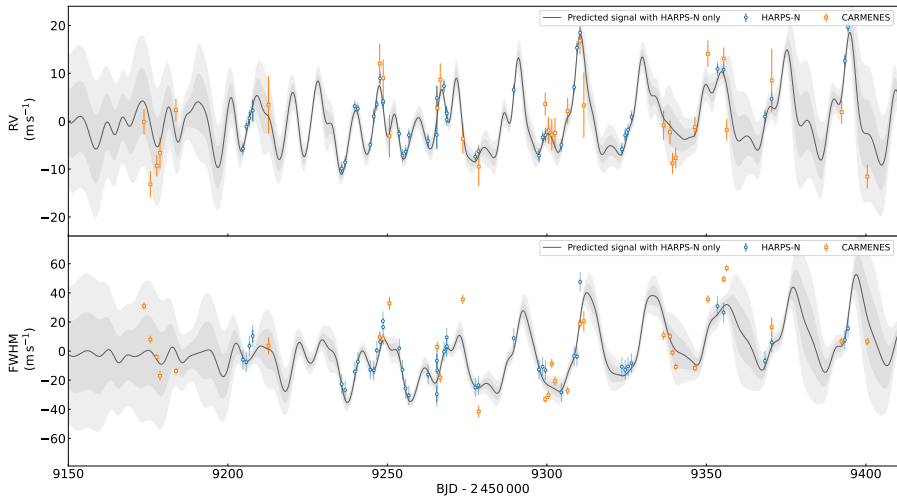

**Fig. S10 Cross-validation analysis of the model from METHOD II.** The two-dimensional GP model trained on HARPS-N only (blue circles) is shown as a solid black line indicating the median model, while light grey shaded areas show the  $1\sigma$  and  $2\sigma$  credible intervals of the predictive GP model. Error bars in the measurements indicate  $1\sigma$  uncertainties.

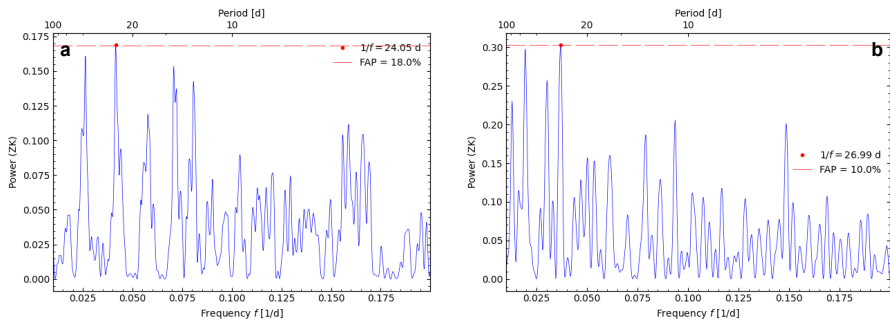

**Fig. S11** Generalized Lomb-Scargle periodograms of the RV residuals obtained after subtracting the combined Keplerian signal of HD 110067 b, c, d, and f from the activity-cleaned RV time series. **a**, GLS periodogram computed from HARPS-N residuals. **b**, GLS periodogram computed from CARMENES residuals. Periodograms are normalized to unity. The highest peak and its false alarm probability (FAP) level are explicitly reported.

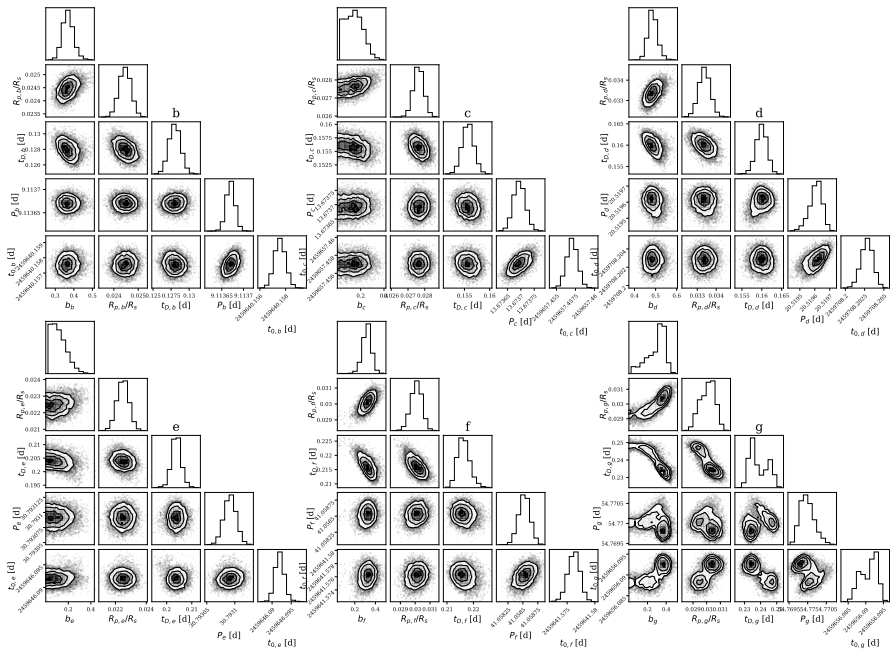

**Fig. S12** Posterior distributions from the photometric fit. The top panels of the corner plot show the probability density function of each transit parameter. Contours are drawn to improve the visualization of the 2D histograms and indicate the 68.3%, 95.5%, and 99.7% confidence interval levels.

**Table S1** Prior and posterior distributions for the TESS and CHEOPS photometric analysis. Error bars denote the 68% posterior credibility intervals.

| Parameter                                           | Unit   | Prior                                                                   | Posterior                             |
|-----------------------------------------------------|--------|-------------------------------------------------------------------------|---------------------------------------|
| Quadratic LD param. $\mu_{\text{TESS},1}$           |        | $\mathcal{N}(\mu = 0.4, \sigma = 0.1, a = 0.0000, b = 1.0000)$          | $0.472 \pm 0.057$                     |
| Quadratic LD param. $\mu_{\text{TESS},2}$           |        | $\mathcal{N}(\mu = 0.21, \sigma = 0.1, a = 0.0000, b = 1.0000)$         | $0.171^{+0.085}$<br>$-0.083$          |
| Quadratic LD param. $\mu_{\text{CHEOPS},1}$         |        | $\mathcal{N}(\mu = 0.52, \sigma = 0.1, a = 0.0000, b = 1.0000)$         | $0.435 \pm 0.065$                     |
| Quadratic LD param. $\mu_{\text{CHEOPS},2}$         |        | $\mathcal{N}(\mu = 0.18, \sigma = 0.1, a = 0.0000, b = 1.0000)$         | $0.156^{+0.086}$<br>$-0.081$          |
| Transit epoch $t_{0,b}$                             | [TJD]  | $\mathcal{N}(\mu = 2640.16, \sigma = 0.03)$                             | $2640.15797^{+0.00036}$<br>$-0.00035$ |
| Orbital period $P_b$                                | [d]    | $\mathcal{N}(\mu = 9.1137, \sigma = 0.0002, a = 9.1129, b = 9.1145)$    | $9.113678 \pm 1e-05$                  |
| $\log R_b/R_s$                                      |        | $\mathcal{U}(a = -6.9, b = -2.3)$                                       | $-3.6651^{+0.0095}$<br>$-0.0095$      |
| Impact parameter $b_b$                              |        | $\mathcal{U}(a = 0.0, b = 1 + R_{p,b}/R_s)$                             | $0.354 \pm 0.033$                     |
| Transit epoch $t_{0,c}$                             | [TJD]  | $\mathcal{N}(\mu = 2657.45, \sigma = 0.03)$                             | $2657.45704 \pm 0.0007$               |
| Orbital period $P_c$                                | [d]    | $\mathcal{N}(\mu = 13.6737, \sigma = 0.0004, a = 13.6723, b = 13.6751)$ | $13.673694 \pm 2.4e-05$               |
| $\log R_c/R_s$                                      |        | $\mathcal{U}(a = -6.9, b = -2.3)$                                       | $-3.583 \pm 0.012$                    |
| Impact parameter $b_c$                              |        | $\mathcal{U}(a = 0.0, b = 1 + R_{p,c}/R_s)$                             | $0.16^{+0.079}$<br>$-0.095$           |
| Transit epoch $t_{0,d}$                             | [TJD]  | $\mathcal{N}(\mu = 2708.2, \sigma = 0.03)$                              | $2708.20282^{+0.00074}$<br>$-0.00079$ |
| Orbital period $P_d$                                | [d]    | $\mathcal{N}(\mu = 20.5196, \sigma = 0.0006, a = 20.5174, b = 20.5218)$ | $20.519617^{+3.8e-05}$<br>$-4.8e-05$  |
| $\log R_d/R_s$                                      |        | $\mathcal{U}(a = -6.9, b = -2.3)$                                       | $-3.4059^{+0.0096}$<br>$-0.0093$      |
| Impact parameter $b_d$                              |        | $\mathcal{U}(a = 0.0, b = 1 + R_{p,d}/R_s)$                             | $0.487 \pm 0.023$                     |
| Transit epoch $t_{0,e}$                             | [TJD]  | $\mathcal{N}(\mu = 2646.09, \sigma = 0.03)$                             | $2646.0919 \pm 0.0011$                |
| Orbital period $P_e$                                | [d]    | $\mathcal{N}(\mu = 30.79309, \sigma = 1e-05, a = 30.7889, b = 30.7973)$ | $30.793091 \pm 1.2e-05$               |
| $\log R_e/R_s$                                      |        | $\mathcal{U}(a = -6.9, b = -2.3)$                                       | $-3.791 \pm 0.018$                    |
| Impact parameter $b_e$                              |        | $\mathcal{U}(a = 0.0, b = 1 + R_{p,e}/R_s)$                             | $0.104^{+0.09}$<br>$-0.071$           |
| Transit epoch $t_{0,f}$                             | [TJD]  | $\mathcal{N}(\mu = 2641.58, \sigma = 0.03)$                             | $2641.5763 \pm 0.001$                 |
| Orbital period $P_f$                                | [d]    | $\mathcal{N}(\mu = 41.0579, \sigma = 0.0002, a = 41.0520, b = 41.0639)$ | $41.05854 \pm 0.001$                  |
| $\log R_f/R_s$                                      |        | $\mathcal{U}(a = -6.9, b = -2.3)$                                       | $-3.498 \pm 0.013$                    |
| Impact parameter $b_f$                              |        | $\mathcal{U}(a = 0.0, b = 1 + R_{p,f}/R_s)$                             | $0.339 \pm 0.041$                     |
| Transit epoch $t_{0,g}$                             | [TJD]  | $\mathcal{N}(\mu = 2656.09, \sigma = 0.03)$                             | $2656.0921^{+0.0013}$<br>$-0.0031$    |
| Orbital period $P_g$                                | [d]    | $\mathcal{N}(\mu = 54.7693, \sigma = 0.0002, a = 54.7605, b = 54.7780)$ | $54.76993^{+0.00026}$<br>$-0.00017$   |
| $\log R_g/R_s$                                      |        | $\mathcal{U}(a = -6.9, b = -2.3)$                                       | $-3.493^{+0.014}$<br>$-0.025$         |
| Impact parameter $b_g$                              |        | $\mathcal{U}(a = 0.0, b = 1 + R_{p,g}/R_s)$                             | $0.362^{+0.042}$<br>$-0.09$           |
| TESS jitter $\log \sigma_{\text{TESS}}$             |        | $\mathcal{N}(\mu = -0.3, \sigma = 1)$                                   | $-1.839 \pm 0.042$                    |
| CHEOPS jitter $\log \sigma_{\text{CHEOPS}}$         |        | $\mathcal{N}(\mu = -1.0, \sigma = 3)$                                   | $-1.695 \pm 0.033$                    |
| Linear decorr. PR110048.TG028101 $dy/dtime$         |        | $\mathcal{N}(\mu = 0, \sigma = 9.0)$                                    | $0.154 \pm 0.012$                     |
| Linear decorr. PR100031.TG052001 $dy/dtime$         |        | $\mathcal{N}(\mu = 0, \sigma = 10.0)$                                   | $-0.074 \pm 0.011$                    |
| Linear decorr. shared param. $dy/dbg$               |        | $\mathcal{N}(\mu = 0, \sigma = 0.4)$                                    | $0.0715 \pm 0.0095$                   |
| Linear decorr. shared param. $dy/dcentroidx$        |        | $\mathcal{N}(\mu = 0, \sigma = 0.4)$                                    | $0.0055 \pm 0.0077$                   |
| Linear decorr. shared param. $dy/dcentroidy$        |        | $\mathcal{N}(\mu = 0, \sigma = 0.4)$                                    | $-0.117 \pm 0.013$                    |
| Linear decorr. shared param. $dy/dcos 2\Phi$        |        | $\mathcal{N}(\mu = 0, \sigma = 0.4)$                                    | $-0.019 \pm 0.058$                    |
| Quadratic decorr. shared param. $d^2y/dcentroidx^2$ |        | $\mathcal{N}(\mu = 0, \sigma = 0.4)$                                    | $0.0142 \pm 0.0016$                   |
| CHEOPS PR110048.TG028101 mean flux                  | [pppt] | $\mathcal{N}(\mu = -0.0, \sigma = 0.6)$                                 | $0.25 \pm 0.044$                      |
| CHEOPS PR100031.TG052001 mean flux                  | [pppt] | $\mathcal{N}(\mu = -0.0, \sigma = 0.4)$                                 | $0.119^{+0.043}$<br>$-0.045$          |
| CHEOPS PR100031.TG052002 mean flux                  | [pppt] | $\mathcal{N}(\mu = -0.0, \sigma = 0.5)$                                 | $0.187 \pm 0.044$                     |
| CHEOPS rollangle B-spline 0                         | [pppt] | $\mathcal{N}(\mu = 0, \sigma = 0.2)$                                    | $0.48 \pm 0.13$                       |
| CHEOPS rollangle B-spline 1                         | [pppt] | $\mathcal{N}(\mu = 0, \sigma = 0.2)$                                    | $-0.23 \pm 0.13$                      |
| CHEOPS rollangle B-spline 2                         | [pppt] | $\mathcal{N}(\mu = 0, \sigma = 0.2)$                                    | $-0.17 \pm 0.11$                      |
| CHEOPS rollangle B-spline 3                         | [pppt] | $\mathcal{N}(\mu = 0, \sigma = 0.2)$                                    | $-0.06 \pm 0.087$                     |
| CHEOPS rollangle B-spline 4                         | [pppt] | $\mathcal{N}(\mu = 0, \sigma = 0.2)$                                    | $-0.138 \pm 0.083$                    |
| CHEOPS rollangle B-spline 5                         | [pppt] | $\mathcal{N}(\mu = 0, \sigma = 0.2)$                                    | $0.025 \pm 0.078$                     |
| CHEOPS rollangle B-spline 6                         | [pppt] | $\mathcal{N}(\mu = 0, \sigma = 0.2)$                                    | $-0.051 \pm 0.081$                    |
| CHEOPS rollangle B-spline 7                         | [pppt] | $\mathcal{N}(\mu = 0, \sigma = 0.2)$                                    | $0.052 \pm 0.084$                     |
| CHEOPS rollangle B-spline 8                         | [pppt] | $\mathcal{N}(\mu = 0, \sigma = 0.2)$                                    | $-0.039 \pm 0.087$                    |
| CHEOPS rollangle B-spline 9                         | [pppt] | $\mathcal{N}(\mu = 0, \sigma = 0.2)$                                    | $0.01 \pm 0.091$                      |
| CHEOPS rollangle B-spline 10                        | [pppt] | $\mathcal{N}(\mu = 0, \sigma = 0.2)$                                    | $-0.002 \pm 0.097$                    |
| CHEOPS rollangle B-spline 11                        | [pppt] | $\mathcal{N}(\mu = 0, \sigma = 0.2)$                                    | $0.07 \pm 0.1$                        |
| CHEOPS rollangle B-spline 12                        | [pppt] | $\mathcal{N}(\mu = 0, \sigma = 0.2)$                                    | $-0.14 \pm 0.1$                       |
| CHEOPS rollangle B-spline 13                        | [pppt] | $\mathcal{N}(\mu = 0, \sigma = 0.2)$                                    | $0.236 \pm 0.098$                     |
| CHEOPS rollangle B-spline 14                        | [pppt] | $\mathcal{N}(\mu = 0, \sigma = 0.2)$                                    | $-0.065 \pm 0.093$                    |
| CHEOPS rollangle B-spline 15                        | [pppt] | $\mathcal{N}(\mu = 0, \sigma = 0.2)$                                    | $-0.057^{+0.085}$<br>$-0.085$         |
| CHEOPS rollangle B-spline 16                        | [pppt] | $\mathcal{N}(\mu = 0, \sigma = 0.2)$                                    | $0.063 \pm 0.082$                     |
| CHEOPS rollangle B-spline 17                        | [pppt] | $\mathcal{N}(\mu = 0, \sigma = 0.2)$                                    | $-0.181 \pm 0.084$                    |
| CHEOPS rollangle B-spline 18                        | [pppt] | $\mathcal{N}(\mu = 0, \sigma = 0.2)$                                    | $0.153 \pm 0.089$                     |
| CHEOPS rollangle B-spline 19                        | [pppt] | $\mathcal{N}(\mu = 0, \sigma = 0.2)$                                    | $-0.079^{+0.094}$<br>$-0.096$         |
| CHEOPS rollangle B-spline 20                        | [pppt] | $\mathcal{N}(\mu = 0, \sigma = 0.2)$                                    | $0.1 \pm 0.097$                       |
| CHEOPS rollangle B-spline 21                        | [pppt] | $\mathcal{N}(\mu = 0, \sigma = 0.2)$                                    | $-0.062^{+0.096}$<br>$-0.094$         |
| CHEOPS rollangle B-spline 22                        | [pppt] | $\mathcal{N}(\mu = 0, \sigma = 0.2)$                                    | $-0.046 \pm 0.093$                    |
| CHEOPS rollangle B-spline 23                        | [pppt] | $\mathcal{N}(\mu = 0, \sigma = 0.2)$                                    | $0.148^{+0.084}$<br>$-0.089$          |
| CHEOPS rollangle B-spline 24                        | [pppt] | $\mathcal{N}(\mu = 0, \sigma = 0.2)$                                    | $-0.238 \pm 0.079$                    |
| CHEOPS rollangle B-spline 25                        | [pppt] | $\mathcal{N}(\mu = 0, \sigma = 0.2)$                                    | $-0.029 \pm 0.078$                    |
| CHEOPS rollangle B-spline 26                        | [pppt] | $\mathcal{N}(\mu = 0, \sigma = 0.2)$                                    | $0.316 \pm 0.081$                     |
| CHEOPS rollangle B-spline 27                        | [pppt] | $\mathcal{N}(\mu = 0, \sigma = 0.2)$                                    | $0.48 \pm 0.12$                       |

Notes.  $\mathcal{N}$  refers to a Normal prior,  $\mathcal{U}$  a uniform prior,  $\mathcal{N}_{\mathcal{U}}$  a bound Normal, and  $I$  to a prior interpolated from a transit-free GP fit.

**Table S2 Priors and posterior distributions of the radial velocity fit model from METHOD I.**

| Parameter                                   | Prior <sup>(a)</sup>               | Final value <sup>(b)</sup>         |
|---------------------------------------------|------------------------------------|------------------------------------|
| <b>HD 110067 b</b>                          |                                    |                                    |
| Orbital period $P$ (days)                   | $\mathcal{N}(9.113667, 0.000011)$  | $9.113667 \pm 0.000011$            |
| Transit epoch $t_0$ (d)                     | $\mathcal{N}(2640.15770, 0.00035)$ | $2640.15770 \pm 0.00035$           |
| RV semi-amplitude $K$ ( $\text{m s}^{-1}$ ) | $\mathcal{U}[0, 10]$               | $< 3.3$                            |
| <b>HD 110067 c</b>                          |                                    |                                    |
| Orbital period $P$ (days)                   | $\mathcal{N}(13.673692, 0.000022)$ | $13.673692 \pm 0.000022$           |
| Transit epoch $t_0$ (d)                     | $\mathcal{N}(1932.75138, 0.00091)$ | $1932.75138^{+0.00092}_{-0.00090}$ |
| RV semi-amplitude $K$ ( $\text{m s}^{-1}$ ) | $\mathcal{U}[0, 10]$               | $< 2.0$                            |
| <b>HD 110067 d</b>                          |                                    |                                    |
| Orbital period $P$ (days)                   | $\mathcal{N}(20.519638, 0.000044)$ | $20.519638 \pm 0.000043$           |
| Transit epoch $t_0$ (d)                     | $\mathcal{N}(2646.64480, 0.00064)$ | $2646.64481 \pm 0.00063$           |
| RV semi-amplitude $K$ ( $\text{m s}^{-1}$ ) | $\mathcal{U}[0, 10]$               | $3.8 \pm 1.0$                      |
| <b>HD 110067 e</b>                          |                                    |                                    |
| Orbital period $P$ (days)                   | $\mathcal{N}(30.79305, 0.00013)$   | $30.79305 \pm 0.00013$             |
| Transit epoch $t_0$ (d)                     | $\mathcal{N}(2646.0922, 0.0016)$   | $2646.0922 \pm 0.0016$             |
| RV semi-amplitude $K$ ( $\text{m s}^{-1}$ ) | $\mathcal{U}[0, 10]$               | $< 3.5$                            |
| <b>HD 110067 f</b>                          |                                    |                                    |
| Orbital period $P$ (days)                   | $\mathcal{N}(41.057, 0.021)$       | $41.051 \pm 0.021$                 |
| Transit epoch $t_0$ (d)                     | $\mathcal{N}(2641.57770, 0.00094)$ | $2641.57769^{+0.00095}_{-0.00094}$ |
| RV semi-amplitude $K$ ( $\text{m s}^{-1}$ ) | $\mathcal{U}[0, 10]$               | $2.28^{+0.69}_{-0.71}$             |
| <b>HD 110067 g</b>                          |                                    |                                    |
| Orbital period $P$ (days)                   | $\mathcal{N}(54.743, 0.027)$       | $54.743 \pm 0.027$                 |
| Transit epoch $t_0$ (d)                     | $\mathcal{N}(2656.0955, 0.0011)$   | $2656.0955 \pm 0.0011$             |
| RV semi-amplitude $K$ ( $\text{m s}^{-1}$ ) | $\mathcal{U}[0, 10]$               | $< 2.5$                            |
| <b>Other parameters</b>                     |                                    |                                    |
| HARPS-N RV jitter [ $\text{m s}^{-1}$ ]     | $\mathcal{U}[0, 100]$              | $3.183^{+0.091}_{-0.067}$          |
| CARMENES RV jitter [ $\text{m s}^{-1}$ ]    | $\mathcal{U}[0, 100]$              | $5.89^{+0.15}_{-0.16}$             |

**Footnotes.** (a)  $\mathcal{U}[a, b]$  refers to a uniform prior and  $\mathcal{N}[a, b]$  to a Gaussian prior with mean  $a$  and standard deviation  $b$ . (b) Errors are defined as the 68.3% confidence interval of the posterior distribution. Upper limits correspond to 99% credible interval of the posterior distribution.



**Table S3** Detrending parameters used in the radial velocity fit model from **METHOD I**.

| Parameter                                                                                | Value <sup>(a)</sup>  |
|------------------------------------------------------------------------------------------|-----------------------|
| HARPS-N $\beta_{0,1}$ [ $10^7$ m s <sup>-1</sup> ]                                       | $-12.7^{+1.3}_{-1.2}$ |
| HARPS-N $\beta_{1,t,1}$ [ $10^2$ m s <sup>-1</sup> yr <sup>-1</sup> ]                    | $-6.5^{+1.9}_{-1.7}$  |
| HARPS-N $\beta_{2,t,1}$ [ $10^3$ m s <sup>-1</sup> yr <sup>-2</sup> ]                    | $25.1^{+3.8}_{-4.0}$  |
| HARPS-N $\beta_{3,t,1}$ [ $10^4$ m s <sup>-1</sup> yr <sup>-3</sup> ]                    | $-7.9^{+1.2}_{-1.1}$  |
| HARPS-N $\beta_{4,t,1}$ [ $10^3$ m s <sup>-1</sup> yr <sup>-4</sup> ]                    | $64.4^{+9.1}_{-5.3}$  |
| HARPS-N $\beta_{1,F,1}$ [ $10^6$ m s <sup>-1</sup> /(km s <sup>-1</sup> ) <sup>2</sup> ] | $54.8^{+5.4}_{-5.5}$  |
| HARPS-N $\beta_{2,F,1}$ [ $10^5$ m s <sup>-1</sup> /(km s <sup>-1</sup> ) <sup>2</sup> ] | $-79.8^{+8.0}_{-7.8}$ |
| HARPS-N $\beta_{3,F,1}$ [ $10^4$ m s <sup>-1</sup> /(km s <sup>-1</sup> ) <sup>3</sup> ] | $38.7^{+3.8}_{-3.9}$  |
| HARPS-N $\beta_{1,\gamma,1}$ [ $10^4$ m s <sup>-1</sup> ]                                | $23.8 \pm 2.4$        |
| HARPS-N $\beta_{2,\gamma,1}$ [ $10^5$ m s <sup>-1</sup> ]                                | $95.9^{+9.7}_{-10.0}$ |
| HARPS-N $\beta_{3,\gamma,1}$ [ $10^7$ m s <sup>-1</sup> ]                                | $12.7 \pm 1.3$        |
| HARPS-N $\beta_{4,\gamma,1}$ [ $10^6$ m s <sup>-1</sup> ]                                | $-14.0^{+1.5}_{-1.4}$ |
| HARPS-N $\beta_{1,A,1}$ [ $10^3$ m s <sup>-1</sup> ]                                     | $74.6^{+8.9}_{-9.6}$  |
| HARPS-N $\beta_{2,A,1}$ [ $10^2$ m s <sup>-1</sup> ]                                     | $-10.2^{+1.3}_{-1.2}$ |
| HARPS-N $\beta_{1,R,1}$ [ $10$ m s <sup>-1</sup> dex <sup>-1</sup> ]                     | $35.8^{+2.4}_{-2.3}$  |
| HARPS-N $\beta_{0,2}$ [ $10^6$ m s <sup>-1</sup> ]                                       | $-6.8^{+1.2}_{-1.0}$  |
| HARPS-N $\beta_{1,t,2}$ [ $10$ m s <sup>-1</sup> yr <sup>-1</sup> ]                      | $-71.1^{+9.9}_{-9.7}$ |
| HARPS-N $\beta_{2,t,2}$ [ $10^2$ m s <sup>-1</sup> yr <sup>-2</sup> ]                    | $8.9^{+1.2}_{-1.3}$   |
| HARPS-N $\beta_{3,t,2}$ [ $10$ m s <sup>-1</sup> yr <sup>-3</sup> ]                      | $-46.2^{+6.9}_{-6.7}$ |
| HARPS-N $\beta_{4,t,2}$ [ $10$ m s <sup>-1</sup> yr <sup>-4</sup> ]                      | $8.4^{+1.3}_{-1.4}$   |
| HARPS-N $\beta_{1,F,2}$ [ $10^5$ m s <sup>-1</sup> /(km s <sup>-1</sup> ) <sup>2</sup> ] | $29.4^{+4.4}_{-5.0}$  |
| HARPS-N $\beta_{2,F,2}$ [ $10^4$ m s <sup>-1</sup> /(km s <sup>-1</sup> ) <sup>2</sup> ] | $-42.2^{+7.1}_{-6.3}$ |
| HARPS-N $\beta_{3,F,2}$ [ $10^3$ m s <sup>-1</sup> /(km s <sup>-1</sup> ) <sup>3</sup> ] | $20.2^{+3.0}_{-3.4}$  |
| HARPS-N $\beta_{1,\gamma,2}$ [ $10$ m s <sup>-1</sup> ]                                  | $28.8^{+8.3}_{-8.5}$  |
| HARPS-N $\beta_{2,\gamma,2}$ [ $10^4$ m s <sup>-1</sup> ]                                | $0.7 \pm 1.8$         |
| HARPS-N $\beta_{3,\gamma,2}$ [ $10^6$ m s <sup>-1</sup> ]                                | $-1.7 \pm 1.4$        |
| HARPS-N $\beta_{4,\gamma,2}$ [ $10^7$ m s <sup>-1</sup> ]                                | $-4.5 \pm 2.6$        |
| HARPS-N $\beta_{1,A,2}$ [ $10^2$ m s <sup>-1</sup> ]                                     | $-12.8^{+3.5}_{-3.2}$ |
| HARPS-N $\beta_{2,A,2}$ [m s <sup>-1</sup> ]                                             | $17.8^{+4.4}_{-4.9}$  |
| HARPS-N $\beta_{1,R,2}$ [ $10$ m s <sup>-1</sup> dex <sup>-1</sup> ]                     | $5.8 \pm 1.9$         |
| CARMENES $\beta_{0,1}$ [ $10^2$ m s <sup>-1</sup> ]                                      | $0.5^{+2.0}_{-1.9}$   |
| CARMENES $\beta_{1,F,1}$ [ $10$ m s <sup>-1</sup> /(km s <sup>-1</sup> ) <sup>2</sup> ]  | $-5.1 \pm 1.9$        |
| CARMENES $\beta_{1,\gamma,1}$ [ $10$ m s <sup>-1</sup> yr <sup>-2</sup> ]                | $5.9^{+1.9}_{-1.7}$   |
| CARMENES $\beta_{1,A,1}$ [m s <sup>-1</sup> yr <sup>-3</sup> ]                           | $12.1^{+4.7}_{-4.6}$  |

**Footnotes.** (a) Errors are defined as the 68.3% credible interval of the posterior distribution.

**Table S4 Parameters, priors, and posterior distributions of the radial velocity fit model from METHOD II.**

| Parameter                                  | Prior <sup>(a)</sup>               | Final value <sup>(b)</sup>            |
|--------------------------------------------|------------------------------------|---------------------------------------|
| <b>HD 110067 b</b>                         |                                    |                                       |
| Orbital period $P_{\text{orb}}$ (days)     | $\mathcal{N}[9.113678, 0.000010]$  | $9.1136781^{+0.0000097}_{-0.0000099}$ |
| Transit epoch $t_0$ (d)                    | $\mathcal{N}[2640.15797, 0.00036]$ | $2640.15797^{+0.00037}_{-0.00035}$    |
| RV semi-amplitude $K$ (m s <sup>-1</sup> ) | $\mathcal{U}[0, 10]$               | $2.03^{+0.62}_{-0.65}$                |
| <b>HD 110067 c</b>                         |                                    |                                       |
| Orbital period $P_{\text{orb}}$ (days)     | $\mathcal{N}[13.673694, 0.000024]$ | $13.673693 \pm 0.000024$              |
| Transit epoch $t_0$ (d)                    | $\mathcal{N}[2657.45704, 0.0007]$  | $2657.45705^{+0.00068}_{-0.00071}$    |
| RV semi-amplitude $K$ (m s <sup>-1</sup> ) | $\mathcal{U}[0, 10]$               | $< 1.55$                              |
| <b>HD 110067 d</b>                         |                                    |                                       |
| Orbital period $P_{\text{orb}}$ (days)     | $\mathcal{N}[20.519617, 0.00004]$  | $20.519617^{+0.000040}_{-0.000039}$   |
| Transit epoch $t_0$ (d)                    | $\mathcal{N}[2708.20282, 0.00080]$ | $2708.20281^{+0.00069}_{-0.00070}$    |
| RV semi-amplitude $K$ (m s <sup>-1</sup> ) | $\mathcal{U}[0, 10]$               | $2.32^{+0.59}_{-0.88}$                |
| <b>HD 110067 e</b>                         |                                    |                                       |
| Orbital period $P_{\text{orb}}$ (days)     | $\mathcal{N}[30.793091, 0.000012]$ | $30.793091 \pm 0.000012$              |
| Transit epoch $t_0$ (d)                    | $\mathcal{N}[2646.0917, 0.0011]$   | $2646.0919 \pm 0.0011$                |
| RV semi-amplitude $K$ (m s <sup>-1</sup> ) | $\mathcal{U}[0, 10]$               | $< 0.80$                              |
| <b>HD 110067 f</b>                         |                                    |                                       |
| Orbital period $P_{\text{orb}}$ (days)     | $\mathcal{N}[41.05854, 0.0001]$    | $41.058536^{+0.000100}_{-0.000096}$   |
| Transit epoch $t_0$ (d)                    | $\mathcal{N}[2641.5763, 0.0010]$   | $2641.57629^{+0.00100}_{-0.00098}$    |
| RV semi-amplitude $K$ (m s <sup>-1</sup> ) | $\mathcal{U}[0, 10]$               | $1.09^{+0.40}_{-0.42}$                |
| <b>HD 110067 g</b>                         |                                    |                                       |
| Orbital period $P_{\text{orb}}$ (days)     | $\mathcal{N}[54.76992, 0.00020]$   | $54.76992 \pm 0.00020$                |
| Transit epoch $t_0$ (d)                    | $\mathcal{N}[2656.0921, 0.0020]$   | $2656.0922^{+0.0019}_{-0.0020}$       |
| RV semi-amplitude $K$ (m s <sup>-1</sup> ) | $\mathcal{U}[0, 10]$               | $< 1.3$                               |
| <b>GP hyperparameters</b>                  |                                    |                                       |
| GP Period $P_{\text{GP}}$ (days)           | $\mathcal{U}[19, 21]$              | $19.80^{+0.14}_{-0.15}$               |
| $\lambda_p$                                | $\mathcal{U}[0.1, 2]$              | $0.454^{+0.063}_{-0.048}$             |
| $\lambda_c$ (days)                         | $\mathcal{U}[10, 100]$             | $46.91^{+7.04}_{-6.52}$               |
| $A_{\text{RV}}$ (m s <sup>-1</sup> )       | $\mathcal{U}[-100, 100]$           | $2.55^{+0.97}_{-0.84}$                |
| $B_{\text{RV}}$ (m s <sup>-1</sup> d)      | $\mathcal{U}[-100, 100]$           | $19.3^{+3.8}_{-2.9}$                  |
| $A_{\text{FWHM}}$ (m s <sup>-1</sup> )     | $\mathcal{U}[0, 100]$              | $25.9^{+4.7}_{-3.7}$                  |
| $B_{\text{FWHM}}$ (m s <sup>-1</sup> d)    | $\mathcal{F}[0]$                   | 0                                     |
| <b>Other parameters</b>                    |                                    |                                       |
| HARPS-N RV offset (km s <sup>-1</sup> )    | $\mathcal{U}[-0.5134, 0.5161]$     | $-0.00354^{+0.00089}_{-0.00080}$      |
| HARPS-N RV jitter (m s <sup>-1</sup> )     | $\mathcal{J}[0.1, 100]$            | $1.14^{+0.42}_{-0.49}$                |
| HARPS-N FWHM offset (km s <sup>-1</sup> )  | $\mathcal{U}[6.3466, 7.4636]$      | $6.8941^{+0.0076}_{-0.0073}$          |
| HARPS-N FWHM jitter (m s <sup>-1</sup> )   | $\mathcal{J}[0.1, 100]$            | $6.47^{+0.85}_{-0.74}$                |
| CARMENES RV offset (km s <sup>-1</sup> )   | $\mathcal{U}[-9.2768, -8.2468]$    | $-8.7636^{+0.0011}_{-0.0010}$         |
| CARMENES RV jitter (m s <sup>-1</sup> )    | $\mathcal{J}[0.1, 100]$            | $1.33^{+1.06}_{-0.95}$                |
| CARMENES FWHM offset (km s <sup>-1</sup> ) | $\mathcal{U}[7.0443, 8.1796]$      | $7.6235^{+0.0078}_{-0.0077}$          |
| CARMENES FWHM jitter (m s <sup>-1</sup> )  | $\mathcal{J}[0.1, 100]$            | $14.35^{+2.26}_{-1.93}$               |

**Footnotes.** (a)  $\mathcal{F}[a]$  refers to a fixed value  $a$  and  $\mathcal{J}[a, b]$  to the modified Jeffrey's prior. (b) Upper limits correspond to 99% credible interval of the posterior distribution.

**Table S5 Gas mass fraction for each planet resulting from the internal structure model.** The indicated values are the median, as well as the 5 and 95 % percentiles of the distribution.

| Planet      | $\log(M_{\text{gas}})_{\text{Method I}}$ | $\log(M_{\text{gas}})_{\text{Method II}}$ |
|-------------|------------------------------------------|-------------------------------------------|
| HD 110067 b | $-2.52^{+0.66}_{-1.65}$                  | $-3.00^{+1.16}_{-3.66}$                   |
| HD 110067 c | $-2.32^{+0.50}_{-1.04}$                  | $-2.13^{+0.44}_{-0.81}$                   |
| HD 110067 d | $-0.92^{+0.37}_{-0.59}$                  | $-0.97^{+0.32}_{-0.37}$                   |
| HD 110067 e | $-6.55^{+3.94}_{-4.91}$                  | $-2.95^{+0.52}_{-0.73}$                   |
| HD 110067 f | $-2.28^{+1.21}_{-7.78}$                  | $-1.44^{+0.34}_{-0.41}$                   |
| HD 110067 g | $-1.39^{+0.40}_{-1.03}$                  | $-1.52^{+0.42}_{-1.06}$                   |
